# Supplementary material for: dsRNA-Mediated Pest Management of Tuta absoluta Is Compatible with Its Biological Control Agent Nesidiocoris tenuis
Source: MDPI journal article supplement (doi:10.3390/insects12040274), 2021-03-24
Supplement: s1 [file s1]

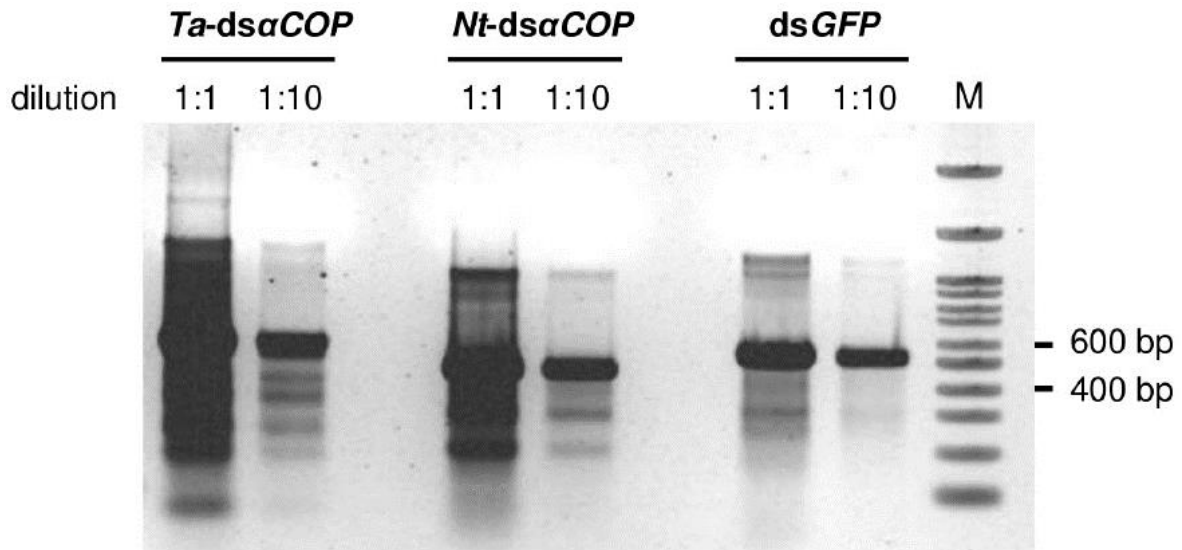

**Figure S1.** In vitro synthesis of dsRNA for application in *T. absoluta* and *N. tenuis*.

```

αCOP_N.tenuis      CCTtggaTTTTggTgA---GctTgCATAgcGGggttATTcAActtTGGGAcTACCggatg
αCOP_T.absoluta   CC----gTTTTcaTcAcagGtcTtCATAatGGttcaATTaAAgccTGGGAtTACCAatca

αCOP_N.tenuis      tgcaCaCTgtTGgAcaAgTTcgATGAGCACGAcGGccCgGTaAGAGgCATctgTTTCCAT
αCOP_T.absoluta   aatgCtCTtaTgCAtgAaTTtaATGACcAtGatGGttCaGTcAGAGcCATtacTTTCCAT

αCOP_N.tenuis      aCcCAGcAGccGcTTTTcgTtTcAGg--AGGAGAcGATtAcAaAATcaaAgTaTGGaAcT
αCOP_T.absoluta   cCtCA--AGgtGaTTTTttTaTaAGTgcAGGAGAtGATaAaAtAATacgAcTtTGGgAtT

αCOP_N.tenuis      AcAaAcatcGAcGAtgcaTCTttActttGTT---gGGtCActtgGAcTacATcCGTaCga
αCOP_T.absoluta   AtAcA---aGAaGAactcTCTcaAaaaaGTTtaaaGGaCAtacaGATtTtATtCGTgCtc

αCOP_N.tenuis      ccatgTTcATCaGgagtAcCCgTGGaTccTcAGcgCcTCCGAcGATCAGACCATTcGtA
αCOP_T.absoluta   ttgacTTtCACcCgactaAgCCcTGGTtTgTtAGttCtTCCGATGATCAaACCATTaGaA

αCOP_N.tenuis      TTTGGAAT-----TGGCAAagccgtactTGcaTttGtgtgctCACcGGgCAcaatCA
αCOP_T.absoluta   TTTGGAATtttatgacTGGCAA-----TGttTagGaacagcCACTGGtCAttcgcA

αCOP_N.tenuis      TTACgTcATGtgcGctcaATTccacccTacAgATGAcAtcgtCgTttcA---GcATCgTT
αCOP_T.absoluta   TTACaTaATGgcaGtaagATT-----TttAaATGAaAattcCtTaataAagtGgATCtTT

αCOP_N.tenuis      gGAcatgaCcgTccGAGTcTGGgatatatcggggctgaggaaaagaacGTTGctccggg
αCOP_T.absoluta   aGatcaatCttTaaGAGTtTGGa-----GTTGt-----

αCOP_N.tenuis      cccgGgAGGaCTcgaaGAacATttgAAGAAcccatcggccacGgaCctTTTcGgTCaggC
αCOP_T.absoluta   ----GaAGGtCTtattGAtaATacaAAGAA-----GagCacTTTtGtTC---C

αCOP_N.tenuis      TgacgcTGTggTcAAACAcyTctTggaaGGgCACGAtCGt
αCOP_T.absoluta   TagtatTGTtaTaAAACAaaTtcTtagtGGcCATGAcCG-

```

**Figure S2.** DNA sequence alignment between the region of *αCOP* from *T. absoluta* used for dsRNA production and the respective region of *αCOP* from *N. tenuis*.
